# Supplementary material for: Large Population Analysis of Secondary Cancers in Pediatric Leukemia Survivors
Source: MDPI journal article supplement (doi:10.3390/children6120130), 2019-11-29

Figure S1: Flow chart representing Table 1 (Panel A) and Table 2 (panel B).

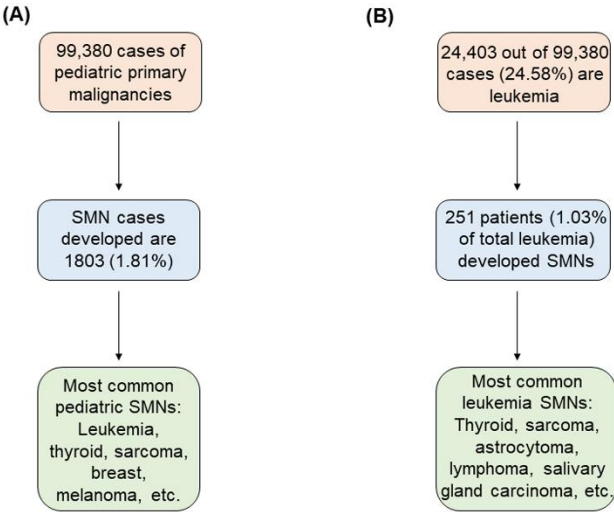

Supplement: s1 [file s1]
